# Supplementary material
Source: Springer Nature journal article supplement (https://www.springermedizin.de/resource/supplementary/12889_2009_2436_MOESM2_ESM.pdf/9485840)

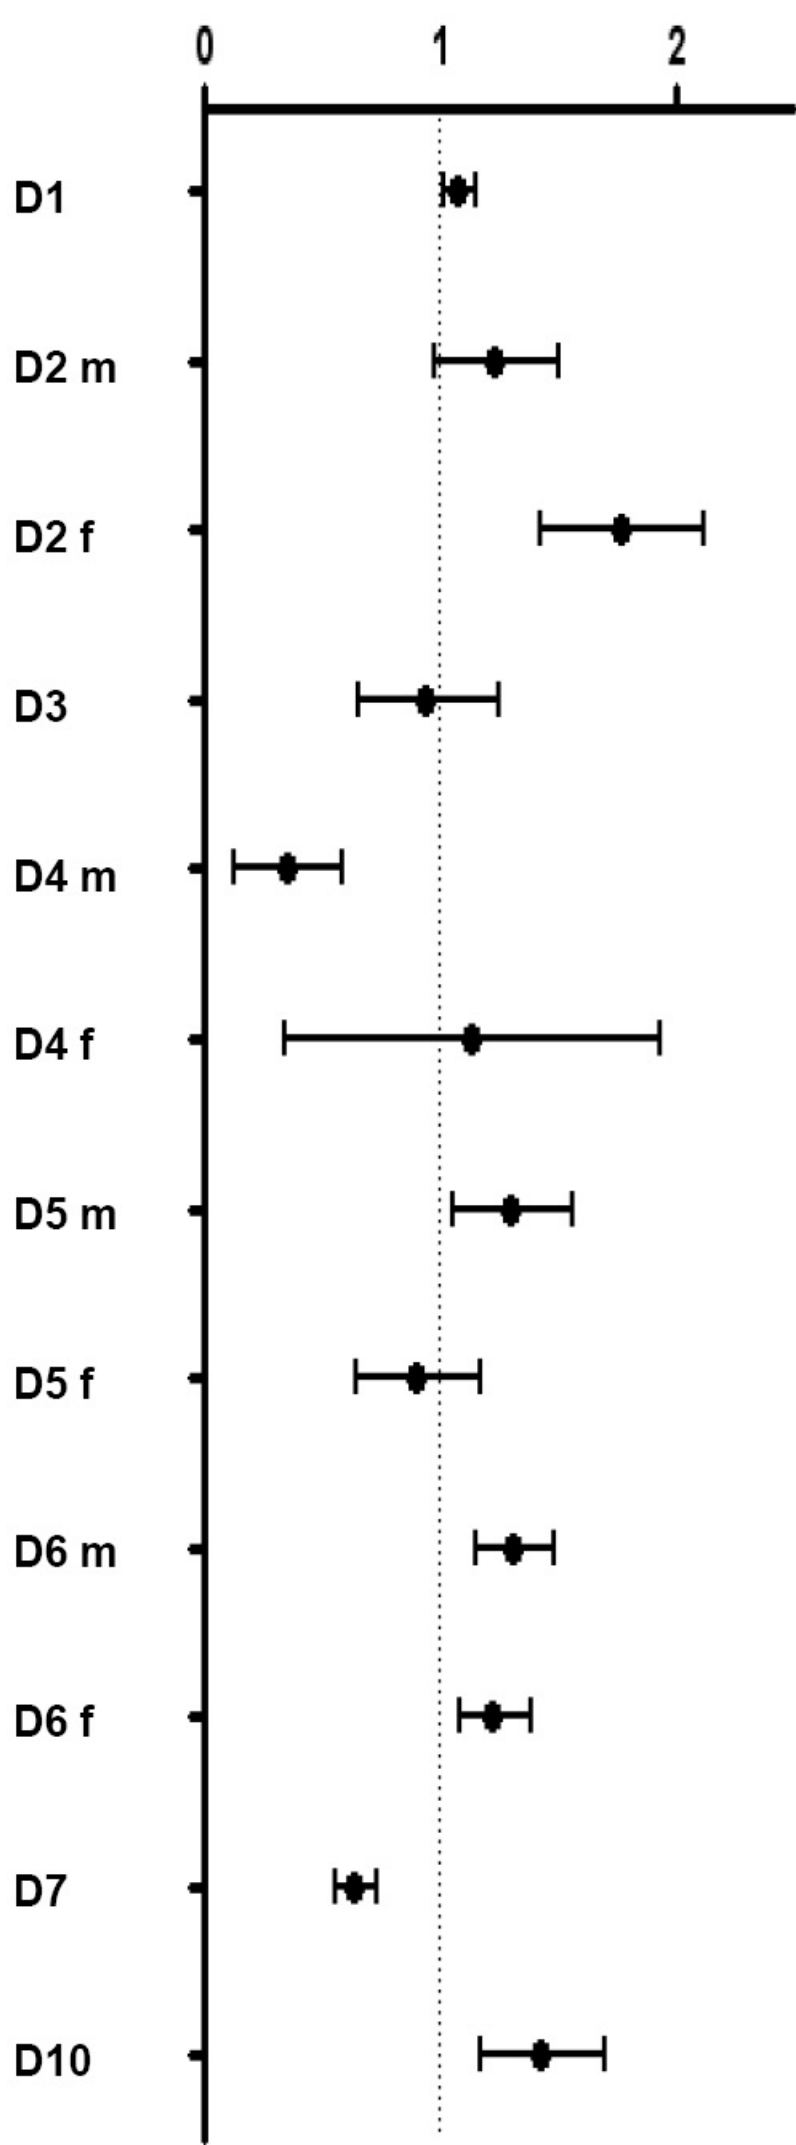

Supplement: MOESM2 [file 9485840]
